# Supplementary material for: In Vitro Anthelmintic Evaluation of Gliricidia sepium, Leucaena leucocephala, and Pithecellobium dulce: Fingerprint Analysis of Extracts by UHPLC-Orbitrap Mass Spectrometry
Source: PubMed Central journal article supplement (PMC7412154; doi:10.3390/molecules25133002), 2020-06-30
Supplement: molecules-25-03002-s001.pdf [file molecules-25-03002-s001.pdf]

## Supplementary material

### **In vitro** Anthelmintic Evaluation of *Gliricidia sepium*, *Leucaena leucocephala*, and *Pithecellobium dulce*: Fingerprint Analysis of Extracts by **UHPLC-Orbitrap Mass Spectrometry**

Néstor Romero<sup>a\*</sup>, Carlos Areche<sup>b</sup>, Andrés Cubides-Cárdenas<sup>c</sup>, Natalia Escobar<sup>d</sup>, Olimpo García-Beltrán<sup>e</sup>, Mario Simirgiotis<sup>f</sup>, Ángel Céspedes<sup>a</sup>

<sup>a</sup>*Departamento de Sanidad Animal, Facultad de Medicina Veterinaria y Zootecnia, Universidad del Tolima, Ibagué, Colombia; [aecesped@ut.edu.co](mailto:aecesped@ut.edu.co) (A.C.)*

<sup>b</sup>*Departamento de Química, Facultad de Ciencias, Universidad de Chile, Las Palmeras 3425, Nuñoa, Santiago 7800024, Chile; [areche@uchile.cl](mailto:areche@uchile.cl) (C.A.)*

<sup>c</sup>*Grupo de Investigación e Innovación en Salud y Bienestar Animal, Laboratorio de Salud Animal, Centro de Investigación Tibaitatá, Agrosavia, Mosquera, Colombia; [jcubides@agrosavia.co](mailto:jcubides@agrosavia.co) (A.C.-C)*

<sup>d</sup>*Facultad de Ciencias Agropecuarias, Universidad de Cundinamarca, Fusagasugá, Colombia; [nataliaescobar@ucundinamarca.edu.co](mailto:nataliaescobar@ucundinamarca.edu.co) (N.E.)*

<sup>e</sup>*Facultad de Ciencias Naturales y Matemáticas, Universidad de Ibagué, Carrera 22 Calle 67, Ibagué 730002, Colombia; [jose.garcia@unibague.edu.co](mailto:jose.garcia@unibague.edu.co) (O.G-B.),*

<sup>f</sup>*Instituto de Farmacia, Universidad Austral de Chile, Valdivia 5090000, Chile; [mario.simirgiotis@uach.cl](mailto:mario.simirgiotis@uach.cl) (M.S.)*

**\*Correspondence:** [njromeroj@ut.edu.co](mailto:njromeroj@ut.edu.co) (N.R)

29

30

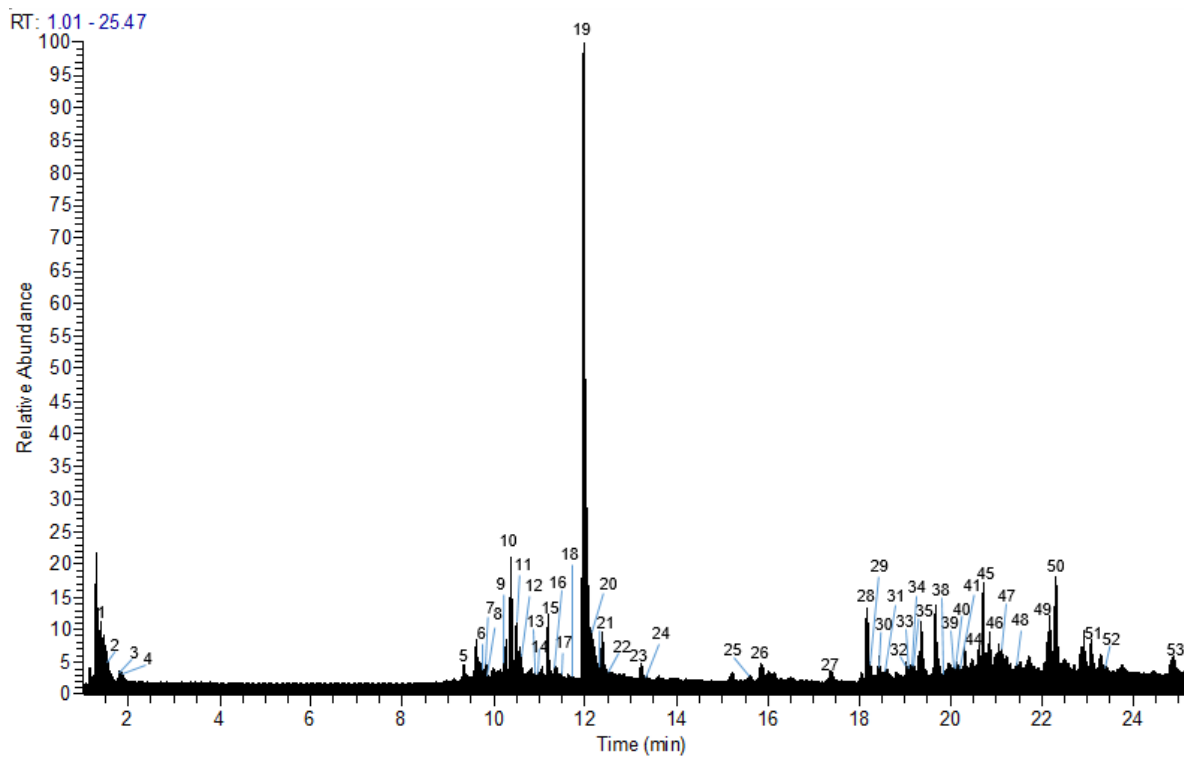

31

32 **Figure S1.** UHPLC TIC (total ion current) chromatogram of *Gliricidia sepium* ethanolic extracts.

33

34

35

36

37

38

39

40

41 **Table S1.** Tentative identification of compounds in the ethanolic extract of *Gliricidia sepium* by UHPLC-Q/Orbitrap/MS/ MS

42

| Peak | Tentative identification                                | [M-H] <sup>-</sup><br>ions                                                | Retention<br>time<br>(min.) | Theoretical<br>mass<br>(m/z) | Measured<br>mass<br>(m/z) | Accuracy<br>(ppm) | Other Ions<br>(m/z)*                                                | UV vis<br>(nm)        |
|------|---------------------------------------------------------|---------------------------------------------------------------------------|-----------------------------|------------------------------|---------------------------|-------------------|---------------------------------------------------------------------|-----------------------|
| 1    | Tetrahydroxypentanal<br>(aldopentose)                   | C <sub>5</sub> H <sub>9</sub> O <sub>5</sub> <sup>-</sup>                 | 1.38                        | 149.0444                     | 149.0449                  | 2.7               | 131.0342                                                            | 265                   |
| 2    | Tetrahydroxypentanal<br>(aldopentose) Isomer            | C <sub>5</sub> H <sub>9</sub> O <sub>5</sub> <sup>-</sup>                 | 1.52                        | 149.0444                     | 149.0449                  | 3.2               | 131.0344                                                            | 334                   |
| 3    | Uridine                                                 | C <sub>9</sub> H <sub>11</sub> O <sub>6</sub> N <sub>2</sub> <sup>-</sup> | 1.79                        | 243.0612                     | 243.0625                  | 5.3               | 157.0307                                                            | 205, 263              |
| 4    | Glutamic acid                                           | C <sub>5</sub> H <sub>8</sub> NO <sub>4</sub> <sup>-</sup>                | 1.88                        | 146.0452                     | 146.0448                  | 2.9               | 102.0553, 128.0345<br>129.0186                                      | 260                   |
| 5    | Hexahydroxytrioxoicosanoic acid                         | C <sub>20</sub> H <sub>33</sub> O <sub>11</sub> <sup>-</sup>              | 9.38                        | 449.2017                     | 449.2030                  | 2.7               | NF.                                                                 | 268, 320,<br>350      |
| 6    | Tetrahydroxytetraoxoicosanoic acid                      | C <sub>20</sub> H <sub>31</sub> O <sub>10</sub> <sup>-</sup>              | 9.75                        | 431.1912                     | 431.1925                  | 3.1               | N.F.                                                                | 244, 265,<br>344, 378 |
| 7    | Trihydroxypentaooxooctadecanoic acid                    | C <sub>18</sub> H <sub>25</sub> O <sub>10</sub> <sup>-</sup>              | 9.82                        | 401.1442                     | 401.1455                  | 3.2               | N.F.                                                                | 260                   |
| 8    | unknown                                                 | C <sub>24</sub> H <sub>21</sub> O <sub>8</sub> <sup>-</sup>               | 9.84                        | 437.1231                     | 437.1223                  | -1.9              | -                                                                   | 244, 261              |
| 9    | Phenyllactic acid-2-O-glucoside                         | C <sub>15</sub> H <sub>19</sub> O <sub>8</sub> <sup>-</sup>               | 10.21                       | 327.1074                     | 327.1087                  | 3.9               | 121.0651, 165.0556 (phenyllactic<br>acid)                           | 246, 265              |
| 10   | Apigenin-di-C-dihexose –O-<br>deoxyhexose               | C <sub>33</sub> H <sub>39</sub> O <sub>19</sub> <sup>-</sup>              | 10.38                       | 739.2091                     | 739.2073                  | 2.0               | 163.0608, 593.1512 (apigenin<br>dihexosa)                           | 219, 267,<br>345      |
| 11   | p-coumaroyl hexose                                      | C <sub>15</sub> H <sub>17</sub> O <sub>8</sub> <sup>-</sup>               | 10.54                       | 325.0918                     | 325.0931                  | 3.9               | 119.0494, 163.0394 (coumaric acid)                                  | 275                   |
| 12   | Apigenin-di-C-dihexose –O-<br>deoxyhexose isomer        | C <sub>33</sub> H <sub>39</sub> O <sub>19</sub> <sup>-</sup>              | 10.63                       | 739.2091                     | 739.2074                  | 2.2               | 163.0607, 593.1510 (apigenin<br>dihexosa)                           | 265, 341              |
| 13   | Rutin                                                   | C <sub>27</sub> H <sub>29</sub> O <sub>16</sub> <sup>-</sup>              | 10.90                       | 609.1461                     | 609.1459                  | 0.3               | 137.0237, 149.0238,                                                 | 260, 284              |
| 14   | Caffeoyl hexoside                                       | C <sub>15</sub> H <sub>17</sub> O <sub>9</sub> <sup>-</sup>               | 10.98                       | 341.0867                     | 341.0880                  | 3.6               | 163.0607, 135.0445, 179.0345<br>(caffeic acid)                      | 270                   |
| 15   | Trihydroxyanthraquinone-O-<br>methylgluconate-glucoside | C <sub>27</sub> H <sub>29</sub> O <sub>15</sub> <sup>-</sup>              | 11.22                       | 593.1501                     | 593.1508                  | 1.1               | 219.0877, 233.1026, 251.1118,<br>255.0297 (trihydroxyanthraquinone) | 265, 292,<br>346      |

|    |                                                                |                        |       |          |          |     |                                                                                                                |                  |
|----|----------------------------------------------------------------|------------------------|-------|----------|----------|-----|----------------------------------------------------------------------------------------------------------------|------------------|
| 16 | Trihydroxyanthraquinone- O-methylgluconate-deoxymethylgluconic | $C_{28}H_{31}O_{16}^-$ | 11.35 | 623.1618 | 623.1611 | 1.1 | 121.0287, 135.0080<br>249.0961                                                                                 | 265, 338         |
| 17 | Trihydroxyanthraquinone-O-methylgluconate                      | $C_{21}H_{19}O_{11}^-$ | 11.49 | 447.0922 | 447.0936 | 3.1 | 115.0393, 117.0550, 119.0343,<br>131.0344, 135.0658, 147.0657,<br>255.0299                                     | 265, 321         |
| 18 | Trihydroxyanthraquinone-O-methylgluconate isomer               | $C_{21}H_{19}O_{11}^-$ | 11.75 | 447.0922 | 447.0936 | 3.1 | 115.0392, 119.0344, 147.0655                                                                                   | 274              |
| 19 | Dihydro-p-coumaric acid isomer                                 | $C_9H_9O_3^-$          | 11.98 | 165.0546 | 165.0552 | 3.3 | 121.0651                                                                                                       | 213, 273         |
| 20 | Ázelaic acid                                                   | $C_9H_{15}O_4^-$       | 12.18 | 187.0976 | 187.0972 | 4.0 | 121.0651, 123.0808, 139.0757,<br>141.0915, 143.1071, 169.0867,<br>171.1020                                     | 270              |
| 21 | p-coumaric acid                                                | $C_9H_7O_3^-$          | 12.37 | 163.0390 | 163.0396 | 3.6 | 117.0338, 119.0496, 121.0286,<br>135.0446, 137.0238                                                            | 238, 276,<br>325 |
| 22 | Dihydroxydioxooctadecanoic acid                                | $C_{18}H_{31}O_6^-$    | 12.53 | 343.2115 | 343.2128 | 3.7 | NF                                                                                                             | 257              |
| 23 | N-Carbobenzyloxy-L-isoleucine                                  | $C_{14}H_{18}O_4N^-$   | 13.26 | 264.1230 | 264.1242 | 4.4 | 128.0346, 130.0503,<br>130.0866 (isoleucine), 150.0557,<br>152.0347, 156.0659, 158.0816,<br>220.1340, 246.1131 | 277, 307         |
| 24 | Apigenin-7-O- glucoside                                        | $C_{21}H_{19}O_{10}^-$ | 13.35 | 431.0973 | 431.0985 | 2.9 | 117.0549, 161.0449, 253.0504<br>(apigenin aglycon)                                                             | 275              |
| 25 | Leu/dihydro-p-coumaric acid                                    | $C_{15}H_{20}NO_4^-$   | 15.59 | 278.1387 | 278.1398 | 4.1 | 119.0495, 121.0651 130.0866,<br>165.0552 ( dihydro-p-coumaric acid)                                            | 284              |
| 26 | Trihydroxy-octadecadienoic acid                                | $C_{18}H_{31}O_5^-$    | 15.85 | 327.2166 | 327.2178 | 3.6 | 155.0707, 159.1020, 169.0865,<br>185.0810, 187.0968, 197.1181,<br>309.2076                                     | 284              |
| 27 | Phe /Dihydro-p-coumaric acid                                   | $C_{18}H_{18}NO_4^-$   | 17.38 | 312.1230 | 312.1244 | 4.2 | 119.0495, 121.0288,147.0445,<br>163.0394, 164.0712 (phenylalanine),<br>174.0555, 268.1343                      | 284, 329         |
| 28 | Dihydroxydodecadienoic acid                                    | $C_{12}H_{19}O_4^-$    | 18.18 | 227.1278 | 227.1287 | 3.9 | 165.1279, 183.1388,191.1073,<br>209.1179                                                                       | 283              |
| 29 | Tianshic Acid                                                  | $C_{18}H_{33}O_5^-$    | 18.26 | 329.2323 | 329.2336 | 4.1 | 167.1071, 171.1020,185.1180,<br>195.1021,197.1179, 213.1129,                                                   | 283              |

|    |                                               |                                                                             |       |          |          |     |                                                                                                                                              |          |
|----|-----------------------------------------------|-----------------------------------------------------------------------------|-------|----------|----------|-----|----------------------------------------------------------------------------------------------------------------------------------------------|----------|
|    |                                               |                                                                             |       |          |          |     | 215.1288, 227.1287, 243.1234,<br>311.2227                                                                                                    |          |
| 30 | Dihydroxydodecadienoic acid isomer            | C <sub>12</sub> H <sub>19</sub> O <sub>4</sub> <sup>-</sup>                 | 18.41 | 227.1278 | 227.1287 | 3.9 | 165.1280, 183.1386, 209.1180                                                                                                                 | 283      |
| 31 | Trihydroxyoctadecadienoic acid isomer         | C <sub>18</sub> H <sub>31</sub> O <sub>5</sub> <sup>-</sup>                 | 18.53 | 327.2166 | 327.2179 | 4.0 | 155.0706, 157.0868, 169.0863,<br>185.0814, 187.0972, 197.1179,<br>217.1076                                                                   | 283      |
| 32 | 7-Hydroxy-4'-methoxyisoflavone (Formononetin) | C <sub>16</sub> H <sub>11</sub> O <sub>4</sub> <sup>-</sup>                 | 19.03 | 267.0652 | 267.0664 | 4.6 | 195.0445, 223.0394                                                                                                                           | 283      |
| 33 | Tianshic acid isomer                          | C <sub>18</sub> H <sub>33</sub> O <sub>5</sub> <sup>-</sup>                 | 19.11 | 329.2323 | 329.2336 | 4.2 | 127.1121, 141.0919, 155.1072,<br>171.1020, 185.1180, 197.1183,<br>199.1336, 213.1128, 215.1288,<br>227.1287, 243.1237, 293.2125,<br>311.2229 | 221, 274 |
| 34 | Tianshic acid derivative                      | C <sub>18</sub> H <sub>29</sub> O <sub>4</sub> <sup>-</sup>                 | 19.15 | 309.2060 | 309.2073 | 4.1 | 155.0708, 169.0865, 171.1021,<br>185.1180, 197.1184, 273.1860,<br>291.1974                                                                   | 222, 274 |
| 35 | Tridecadienedioic acid                        | C <sub>13</sub> H <sub>19</sub> O <sub>4</sub> <sup>-</sup>                 | 19.18 | 239.1278 | 239.1288 | 4.0 | N.F.                                                                                                                                         | 275      |
| 36 | Unknow                                        | -                                                                           | 19.21 | -        | 939.4911 | -   | -                                                                                                                                            | 276      |
| 37 | Unknow                                        | -                                                                           | 19.36 | -        | 941.5068 | -   | -                                                                                                                                            | 282      |
| 38 | Dihydrocapsiate                               | C <sub>18</sub> H <sub>27</sub> O <sub>4</sub> <sup>-</sup>                 | 19.84 | 307.1904 | 307.1917 | 4.3 | 125.0965, 127.0758, 137.0966,<br>139.1121, 155.0707, 167.0709,<br>171.1023, 179.1072, 183.1022,<br>195.1023, 209.1183, 247.1703,<br>289.1811 | 282      |
| 39 | Tianshic acid derivative                      | C <sub>18</sub> H <sub>29</sub> O <sub>4</sub> <sup>-</sup>                 | 20.06 | 309.2060 | 309.2074 | 4.4 | 125.0965, 137.0964, 153.0917,<br>155.0707, 171.1020, 185.1179,<br>197.1181, 213.1130                                                         | 282      |
| 40 | Unknow                                        | C <sub>29</sub> H <sub>51</sub> O <sub>15</sub> N <sub>1</sub>              | 20.08 | -        | 779.4565 | -   | -                                                                                                                                            | 282      |
| 41 | Hydroxydioxoheptadecenoic acid                | C <sub>17</sub> H <sub>27</sub> O <sub>5</sub> <sup>-</sup>                 | 20.15 | 311.1853 | 311.1866 | 4.0 | 153.1279, 171.1021, 193.0867,<br>195.1025, 197.1180, 211.1342,<br>237.1129, 239.1287, 267.1236,<br>267.1965, 293.1755                        | 282      |
| 42 | Unknow                                        | C <sub>30</sub> H <sub>53</sub> O <sub>15</sub> N <sub>1</sub> <sup>-</sup> | 20.31 | -        | 793.4355 | -   | -                                                                                                                                            | 282      |
| 43 | Unknow                                        | C <sub>27</sub> H <sub>39</sub> O <sub>7</sub> <sup>-</sup>                 | 20.51 | 475.2690 | 475.2704 | -   | -                                                                                                                                            | 281      |

|    |                                     |                                                              |       |          |          |      |                                                                                                                                 |          |
|----|-------------------------------------|--------------------------------------------------------------|-------|----------|----------|------|---------------------------------------------------------------------------------------------------------------------------------|----------|
| 44 | Dihydroxyoctadecadienoic acid       | C <sub>18</sub> H <sub>31</sub> O <sub>4</sub> <sup>-</sup>  | 20.63 | 311.2217 | 311.2229 | 4.0  | 157.0865, 173.1176, 183.1380,<br>211.1337, 223.1339, 239.1288,<br>293.2123                                                      | 281      |
| 45 | Phenethyl Butyrate                  | C <sub>12</sub> H <sub>15</sub> O <sub>2</sub> <sup>-</sup>  | 20.73 | 191.1067 | 191.1074 | 4.0  | 121.0650, 175.0762,                                                                                                             | 282      |
| 46 | p-coumaric acid deriative           | C <sub>9</sub> H <sub>11</sub> O <sub>2</sub> <sup>-</sup>   | 20.84 | 151.0754 | 151.0759 | 3.5  | 119.0502, 121.0651                                                                                                              | 281      |
| 47 | Tianshic acid derivative            | C <sub>18</sub> H <sub>29</sub> O <sub>4</sub> <sup>-</sup>  | 21.13 | 309.2060 | 309.2074 | 4.4  | 153.1278, 167.1073, 169.1228,<br>179.1437, 181.1231, 195.1386,<br>197.1180, 211.1336, 213.1129,<br>263.2017, 281.1759, 291.1965 | 281      |
| 48 | Marrubiin                           | C <sub>20</sub> H <sub>27</sub> O <sub>4</sub> <sup>-</sup>  | 21.46 | 331.1904 | 331.1917 | 4.0  | 193.1591, 247.1340, 259.2071,<br>287.2014                                                                                       | 278      |
| 49 | Hydroxyoctadecatrienoic acid        | C <sub>18</sub> H <sub>29</sub> O <sub>3</sub> <sup>-</sup>  | 22.16 | 293.2111 | 293.2123 | 4.1  | 231.2116, 235.1701, 275.2015,<br>277.1805                                                                                       | 248, 275 |
| 50 | Hydroxyoctadecatrienoic acid isomer | C <sub>18</sub> H <sub>29</sub> O <sub>3</sub> <sup>-</sup>  | 22.30 | 293.2111 | 293.2123 | 4.1  | 231.2123, 275.2015                                                                                                              | 248, 275 |
| 51 | Hydroxylinoleic acid                | C <sub>18</sub> H <sub>31</sub> O <sub>3</sub> <sup>-</sup>  | 23.08 | 295.2268 | 295.2280 | 4.1  | 277.2171, 195.1386                                                                                                              | 275      |
| 52 | Pentadecatetraenoic acid            | C <sub>15</sub> H <sub>21</sub> O <sub>2</sub> <sup>-</sup>  | 23.39 | 233.1536 | 233.1546 | 4.2  | -                                                                                                                               | 275      |
| 53 | Unknow                              | C <sub>30</sub> H <sub>41</sub> O <sub>11</sub> <sup>-</sup> | 24.88 | 577.2649 | 577.2686 | -6.4 | -                                                                                                                               | 275      |

43

\* Daughter ions

44

45 *Compounds associated with anthelmintic activity in Gliricidia sepium*

46 *Glycosylated flavonoids.* Four glycosylated flavonoids (peaks 10, 12, 13 and 24) were identified in the  
47 ethanolic extract using UHPLC-Q/Orbitrap/MS/MS. Peak 10 with a [M–H]–ion  $m/z$  739.2073 and  
48 daughter ions at  $m/z$  163.0605 (deoxyhexose), 593.1502 (apigenin dihexose), 431.0981 and 285.0402  
49 were designated as apigenin-di-C-dihexose-O-deoxyhexose [1]. Peak 12 with a [M–H]–ion  $m/z$   
50 739.2074 and daughter ions at  $m/z$  163.0607 (deoxyhexose) and 593.1510 (apigenin dihexose) were  
51 called apigenin-di-C-dihexose–O-deoxihexosa isomer [1]. Peak 13 with a [M–H]–ion  $m/z$  609.1459  
52 and daughter ions at  $m/z$  137.0237, 149.0238 were identified as rutin [2]. Peak 24 with a [M–H]–ion  
53  $m/z$  431.0985 and daughter ions at  $m/z$  253.504 (apigenin aglycone) and 161.0449 (hexoside), were  
54 identified as apigenin-7-O-glucoside [3].

55 *Phenylpropanoids other than flavonoids.* Seven phenylpropanoids other than flavonoids corresponding  
56 to peaks 11, 14, 19, 21, 25, 27 and 46 were identified using UHPLC-Q/Orbitrap/MS/MS. Peak 11 with  
57 a [M–H]–ion  $m/z$  325.0931 and the daughter ions at  $m/z$  163.0394 (coumaric acid) and 119.0494 were  
58 identified as *p*-cumaroyl hexose [4]. Peak 14 with a [M–H]–ion  $m/z$  341.0880, daughter ions at  $m/z$   
59 179.0345 (caffeic acid), 163.0607 and 135.0445 were identified as caffeoyl hexoside [5]. Peak 19 with  
60 a [M–H]–ion  $m/z$  165.0552 and daughter ion 121.0651, were identified as isomer of dihydro-*p*-  
61 coumaric acid [6]. Peak 21 with a [M–H]– ion  $m/z$  163.0396 and daughter ions at  $m/z$  119.0494,  
62 121.0286, 135.0446 and 137.0238 were identified as *p*-coumaric acid [7,8] also [9] identified the same  
63 acid in *G. sepium*. Peak 25 with a [M–H]–ion  $m/z$  278.1398 and daughter ions at  $m/z$  165.0552 (dihydro  
64 *p*-coumaric acid) and 130.0866 (leucine), were identified as leucine/dihydro-*p*-coumaric acid. Peak 27  
65 with a [M–H]–ion  $m/z$  312,1244 and daughter ions at  $m/z$  119,0494, 121,0288, 147,0445, 163,0394  
66 and 164,0712 (phenylalanine), were identified as phenylalanine/dihydro-*p*-coumaric acid. Peak 46 with  
67 a [M–H]–ion  $m/z$  151.0759 and daughter ions at  $m/z$  119.0502, 121.0651 and 133.0652 were identified  
68 as derived from *p*-coumaric acid.

69 *Methoxyphenols.* One phenol was identified using UHPLC-Q/Orbitrap/MS/MS. Peak 38 with a  
70 [M–H]–ion  $m/z$  307.1917 and daughter ions at  $m/z$  125.0965, 127.0758, 137.0966, 139.1121,  
71 155.0707, 167.0709 171.1023, 179.1072 183.1022, 195.1023, 209.1183, 247.1703 and 289.1811 were  
72 identified as dihydrocapsiate [10].

73 *Anthraquinonic glycosides.* Four different anthraquinonic glycosides (peaks 15, 16, 17 and 18) were  
74 identified using UHPLC-Q/Orbitrap/MS/MS. Peak 15 with a [M–H]–ion  $m/z$  593.1508 and daughter  
75 ions at  $m/z$  121.0287, 219.0877, 233.1026, 251,1118 and 255,0297 (trihydroxi- anthraquinone), were

76 identified as trihydroxy-anthraquinone-O-methylgluconate-glycoside [11]. Peak 16 with a [M-H]<sup>-</sup> ion  
77  $m/z$  623.1611 and daughter ions at  $m/z$  593.1508, 249.0961, 121.0287 and 135.0080 were identified as  
78 trihydroxy-anthraquinone-O-methylgluconate-deoxymethylgluconic. Peak 17 with a [M-H]<sup>-</sup> ion  $m/z$   
79 447.0936 and daughter ion at  $m/z$  255.0299 (trihydroxy-anthraquinone) were identified as trihydroxy-  
80 anthraquinone-O-methylgluconate [11]. Peak 18 with [M-H]<sup>-</sup> ion  $m/z$  447.0936 and daughter ions at  
81  $m/z$  115.0392, 119.0344 and 147.0655 were identified as a trihydroxy-anthraquinone-O-  
82 methylgluconate isomer.

83 *Amino acids.* Two amino acids (peaks 4 and 23) were identified in the ethanolic extract using UHPLC-  
84 Q/Orbitrap/MS/MS. Peak 4 with a [M-H]<sup>-</sup> ion  $m/z$  146.0448 and daughter ions at  $m/z$  102.0553,  
85 128.0345, 129.0186 were identified as glutamic acid. Peak 23 with a [M-H]<sup>-</sup> ion  $m/z$  264.1242 and  
86 daughter ions at  $m/z$  130.0866 (isoleucine) and 128.0346, 130.0503, 150.0557, 152.0710, 156.0659,  
87 158.0816, 220.1340 and 246.1131 were identified as N-Carbobenzyloxy-L-isoleucine.

88 *Glycosylated phenolic acids.* One glycosylated phenolic acid was identified using UHPLC-  
89 Q/Orbitrap/MS/MS. Peak 9 with a [M-H]<sup>-</sup> ion  $m/z$  327.1087 and characteristic daughter ions at  $m/z$   
90 165.0556 (phenylactic acid), 121.0651, 147.0446 were identified as phenyllactic acid-2-O -glucoside  
91 [4].

92 *Fatty acids.* One fatty acid was identified using UHPLC-Q/Orbitrap/MS/MS. Peak 20 with a [M-H]<sup>-</sup>  
93 ion  $m/z$  187.0972 and daughter ions at  $m/z$  121.0651, 123.0808, 139.0757, 141.0915, 143.1071,  
94 169.0867 and 171.1020 were identified as azelaic acid [12].

95 Figure S2 shows the UHPLC total ion current chromatogram and Table S2 shows all the compounds  
96 detected and identified by UHPLC-Q/Orbitrap/MS/MS in *L. leucocephala*.

97



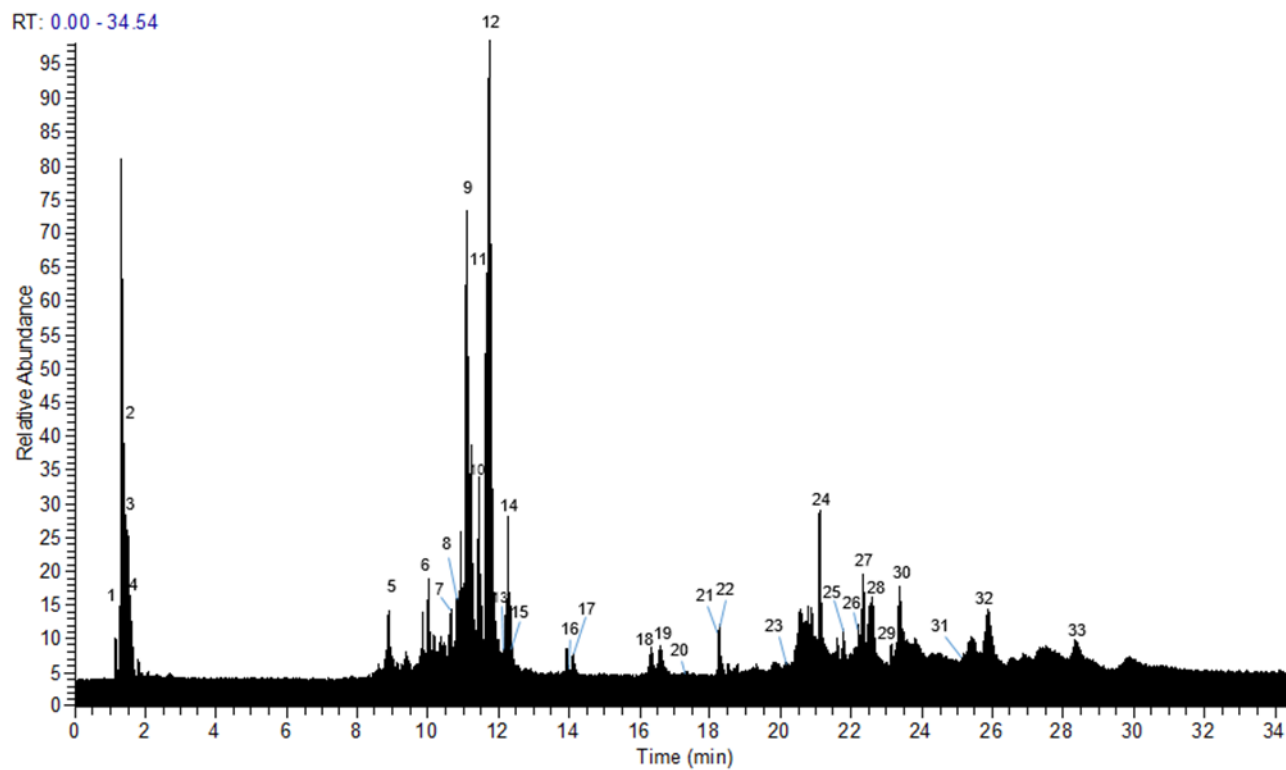

98

99

**Figure S2.** UHPLC TIC Chromatogram *Leucaena leucocephala* ethanolic extract

100 **Table S2.** Tentative identification of compounds of the ethanolic extract of *Leucaena leucocephala* by UHPLC-Q/Orbitrap/ MS/MS

101

| Peak | Tentative identification                                 | [M-H] <sup>-</sup><br>ions                                   | Retention<br>time<br>(min.) | Theoretical<br>mass<br>(m/z) | Measured<br>mass<br>(m/z) | Accuracy (ppm) | Other ions<br>(m/z)*                                                        | UV vis<br>(nm)        |
|------|----------------------------------------------------------|--------------------------------------------------------------|-----------------------------|------------------------------|---------------------------|----------------|-----------------------------------------------------------------------------|-----------------------|
| 1    | Gluconic acid                                            | C <sub>6</sub> H <sub>11</sub> O <sub>7</sub> <sup>-</sup>   | 1.28                        | 195.0505                     | 195.0508                  | -1.5           | 181.0715, 165.040                                                           | 251,275               |
| 2    | Syringaldehyde syringate or<br>derivative of quinic acid | C <sub>18</sub> H <sub>17</sub> O <sub>9</sub> <sup>-</sup>  | 1.35                        | 377.0873                     | 377.0857                  | 4.2            | 347.0745, 349.0905                                                          | 267                   |
| 3    | Dihydroxy methoxy butanoic acid                          | C <sub>5</sub> H <sub>9</sub> O <sub>5</sub> <sup>-</sup>    | 1.39                        | 149.0450                     | 149.0449                  | 0.6            | 131.0343, 119.0342, 135.0292,<br>103.0392                                   | 202, 241, 269         |
| 4    | Syringaldehyde syringate or<br>derivative of quinic acid | C <sub>18</sub> H <sub>17</sub> O <sub>9</sub> <sup>-</sup>  | 1.47                        | 377.0878                     | 377.0857                  | 5.5            | 131.0342, 149.0449, 341.1090                                                | 267                   |
| 5    | Pentahydroxytetraoxoicosanoic acid                       | C <sub>20</sub> H <sub>31</sub> O <sub>11</sub> <sup>-</sup> | 8.8                         | 447.1866                     | 447.1874                  | -1.7           | 437.1587, 401.1819, 199.1831,<br>155.1345                                   | 238                   |
| 6    | Tetrahydroxytetraoxoicosanoic acid                       | C <sub>20</sub> H <sub>31</sub> O <sub>10</sub> <sup>-</sup> | 10.02                       | 431.1917                     | 431.1925                  | 1.85           | 183.4840, 137.5310, 457.6654                                                | 239;276               |
| 7    | Myricetin-3-O-hexoside                                   | C <sub>21</sub> H <sub>19</sub> O <sub>13</sub> <sup>-</sup> | 10.65                       | 479.0826                     | 479.0833                  | -0.003         | 125.0240, 287.0196                                                          | 270; 354              |
| 8    | Myricetin-3-arabinoside                                  | C <sub>20</sub> H <sub>17</sub> O <sub>12</sub> <sup>-</sup> | 10.82                       | 449.0720                     | 449.0728                  | -1.78          | 125.0235, 271.0246, 316.0229                                                | 272;344               |
| 9    | Myrcetine rhamnose derivative                            | C <sub>20</sub> H <sub>17</sub> O <sub>12</sub> <sup>-</sup> | 11.12                       | 463.0877                     | 463.0882                  | -1.07          | 151.0036, 178.9982, 271.0249,<br>316.0226, 317.0289 (aglycone<br>myrcetin)  | 208, 262, 302         |
| 10   | Quercetin-3-O-arabinoside                                | C <sub>20</sub> H <sub>17</sub> O <sub>11</sub> <sup>-</sup> | 11.41                       | 433.0771                     | 433.0778                  | -1.61          | 151.0031, 178.9982<br>271.0246, 300.0287, 301.0343<br>(aglycone quercetin)  | 267, 353              |
| 11   | Quercetin-3-O-pentoside                                  | C <sub>20</sub> H <sub>17</sub> O <sub>11</sub> <sup>-</sup> | 11.69                       | 433.0771                     | 443.0778                  | -1.61          | 151.0031, 178.9982, 271.024,<br>300.0269, 301.0346( aglycone<br>quercetin), | 269, 351              |
| 12   | Quercetin 3-O-rhamnoside                                 | C <sub>21</sub> H <sub>19</sub> O <sub>11</sub> <sup>-</sup> | 11.70                       | 447.0927                     | 447.0934                  | -1.56          | 151.0030, 178.9982, 255.0298,<br>300.0298, 301.0347 (aglycone<br>quercetin) | 203, 257, 293,<br>349 |
| 13   | Kaempferol-3-O-pentoside                                 | C <sub>20</sub> H <sub>17</sub> O <sub>10</sub> <sup>-</sup> | 12.17                       | 417.0832                     | 417.0822                  | 2.39           | 255.0306, 285.0404 (aglycone<br>kaempferol),                                | 282                   |

|    |                                                     |                                                                             |       |          |          |        |                                                             |          |
|----|-----------------------------------------------------|-----------------------------------------------------------------------------|-------|----------|----------|--------|-------------------------------------------------------------|----------|
| 14 | Kaempferol-3-O-rhamnoside                           | C <sub>21</sub> H <sub>19</sub> O <sub>10</sub> <sup>-</sup>                | 12.29 | 431.0978 | 431.0987 | -2.08  | 255.0296, 285.0406 (aglycone kaempferol), 227.0345          | 269, 334 |
| 15 | Diosmetin-6-c- glucoside or Hispidulin -7-glucoside | C <sub>22</sub> H <sub>21</sub> O <sub>11</sub> <sup>-</sup>                | 12.37 | 461.1084 | 461.1092 | -1.73  | 431.0987, 283.0612                                          | 280      |
| 16 | Luteolin                                            | C <sub>15</sub> H <sub>9</sub> O <sub>6</sub> <sup>-</sup>                  | 14.01 | 285.0399 | 285.0407 | -2.80  | 133.0290                                                    | 211, 284 |
| 17 | Quercetin                                           | C <sub>15</sub> H <sub>9</sub> O <sub>7</sub> <sup>-</sup>                  | 14.13 | 301.0348 | 301.0356 | -1.32  | 107.0130, 151.0029                                          | 211, 284 |
| 18 | Oxilipin (Trihydroxyoctadecadienoic acid)           | C <sub>18</sub> H <sub>31</sub> O <sub>5</sub> <sup>-</sup>                 | 16.35 | 327.2171 | 327.2179 | -2.75  | 211.3037                                                    | 283      |
| 19 | Apigenin                                            | C <sub>15</sub> H <sub>9</sub> O <sub>5</sub> <sup>-</sup>                  | 16.59 | 269.0450 | 269.0457 | -2.60  | 107.0103, 117.0340                                          | 283      |
| 20 | Chrysoeriol                                         | C <sub>16</sub> H <sub>11</sub> O <sub>6</sub> <sup>-</sup>                 | 17.24 | 299.0556 | 299.0563 | -2.34  | 269.0455                                                    | 283      |
| 21 | Trihydroxyoctadecanoic acid                         | C <sub>18</sub> H <sub>33</sub> O <sub>5</sub> <sup>-</sup>                 | 18.25 | 329.2328 | 329.2336 | -2.43  | 183.1387                                                    | 283      |
| 22 | Dihydroxidodecadienoic acid                         | C <sub>12</sub> H <sub>19</sub> O <sub>4</sub> <sup>-</sup>                 | 18.26 | 227.1283 | 227.1287 | -1.76  | 245.0814, 183.1387, 171.0195, 115.1143, 183.1386, 277.8189  | 283      |
| 23 | Unknown                                             | C <sub>28</sub> H <sub>43</sub> O <sub>11</sub> <sup>-</sup>                | 20.67 | 555.2805 | 555.2846 | 7.38   | -----                                                       | 278      |
| 24 | Unknown                                             | C <sub>28</sub> H <sub>51</sub> O <sub>13</sub> N <sub>9</sub> <sup>-</sup> | 21.11 | 721.3606 | 721.3638 | 46.02  | -----                                                       | 276      |
| 25 | Unknown                                             | C <sub>30</sub> H <sub>45</sub> O <sub>9</sub> N <sub>7</sub> <sup>-</sup>  | 21.76 | 647.3337 | 647.3278 | 9.11   | -----                                                       | 275      |
| 26 | Hydroxyoctadecatrienoic acid                        | C <sub>18</sub> H <sub>29</sub> O <sub>3</sub> <sup>-</sup>                 | 22.22 | 293.2117 | 293.2126 | -3.06  | -----                                                       | 275      |
| 27 | Hydroxyoctadecatrienoic acid isomer                 | C <sub>18</sub> H <sub>29</sub> O <sub>3</sub> <sup>-</sup>                 | 22.34 | 293.2117 | 293.2125 | -2.72  | -----                                                       | 275      |
| 28 | Octahydroxyheptacosapentaenoic acid                 | C <sub>27</sub> H <sub>43</sub> O <sub>10</sub> <sup>-</sup>                | 22.60 | 527.2856 | 527.2864 | -1.51  | 339.2002, 377.1429, 473.2830, 177.8446, 151.3607, 335.1313, | 275      |
| 29 | Hydroxyoctadecadienoic acid                         | C <sub>18</sub> H <sub>31</sub> O <sub>3</sub> <sup>-</sup>                 | 23.13 | 295.2279 | 295.2282 | -1.01  | -----                                                       | 275      |
| 30 | Pentadecatetraenoic acid                            | C <sub>15</sub> H <sub>21</sub> O <sub>2</sub> <sup>-</sup>                 | 23.35 | 233.1542 | 233.1546 | -1.71  | 183.0118                                                    | 276      |
| 31 | Unknown                                             | C <sub>30</sub> H <sub>41</sub> O <sub>11</sub> <sup>-</sup>                | 25.38 | 577.2649 | 577.2689 | -6.92  | -----                                                       | 275      |
| 32 | Dihydroxypentadecatetraenoic acid                   | C <sub>15</sub> H <sub>21</sub> O <sub>4</sub> <sup>-</sup>                 | 25.86 | 265.1440 | 265.1481 | -15.46 | -----                                                       | 275      |
| 33 | Dihydroxypentadecatetraenoic acid Isomer            | C <sub>15</sub> H <sub>21</sub> O <sub>4</sub> <sup>-</sup>                 | 28.34 | 265.1440 | 265.1481 | -15.46 | -----                                                       | 275      |

104 *Compounds associated with anthelmintic activity in Leucaena leucocephala*

105 *Glycosylated flavonoids.* Nine glycosylated flavonoids corresponding to peaks 7, 8, 9, 10, 11, 12, 13,  
106 14 and 15 were identified using UHPLC-Q/Orbitrap/MS/MS. Peak 7 with a [M-H]-ion at  $m/z$  479.0833  
107 and daughter ions at  $m/z$  125.0240, 287.0196 were identified as myricetin-3-O-hexoside [13] Peak 8  
108 with a [M-H]-ion  $m/z$  449.0728 and daughter ions at  $m/z$  271.0246, 125.0235 and 316.0229 were  
109 identified as myricetin-3-arabinoside [14]. Peak 9 with a [M-H]-ion 463.0882 and daughter ions at  $m/z$   
110 151.0036, 178.9982, 271.0249, 316.0226, 317.0289 (aglycone myricetin) were identified as myricetin  
111 rhamnose derivative [15], which was identified in *L. leucocephala* [16]. Peak 10 with a [M-H]-ion  
112 433.0778 and daughter ions at  $m/z$  151.0031, 178.9982, 271.0246, 300.0287 and 301.0343 (aglycone  
113 quercetin) were identified as quercetin-3-O-arabinoside, Aderogba and collaborators [17,18] identified  
114 in *L. leucocephala* quercetin-3-O-arabinofuranoside. Peak 11 with a [M-H]-ion 443.0778 and daughter  
115 ions at  $m/z$  151.0031, 178.9982, 271.024, 300.0269, 301.0346 (aglycone quercetin moiety) were  
116 identified as quercetin-3-O-pentoside [19]. Peak 12 with a [M-H]-ion 447.0934 and daughter ions at  
117  $m/z$  151.0030, 178.9982, 255.0298, 300.0298 and 301.0347 (aglycone quercetin moiety) were identified  
118 as quercetin 3-O-rhamnoside [20], some authors [17,21,22] identified in *L. leucocephala* the same  
119 compound. Peak 13 with a [M-H]-ion 417.0882 and daughter ions at  $m/z$  255.0306 and 285.0404  
120 (aglycone kaempferol) were identified as kaempferol-3-O-pentoside [23]. Peak 14 with a [M-H]-ion  
121 431.0987 and daughter ions at  $m/z$  255.0296, 285.0406 (aglycone kaempferol) and 227.0345 were  
122 identified as kaempferol-3-O-rhamnoside. Peak 15 with a [M-H]-ion 461.1092 and daughter ions at  
123  $m/z$  431.0987 and 283.0612 were identified as diosmetin-6-c-glucoside or hispidulin-7-glucoside  
124 [24,25] *Flavonoids.* Four different flavonoids (peaks 16, 17, 19 and 20) were identified using UHPLC-  
125 Q/Orbitrap/MS/MS. Peak 16 with a [M-H]-ion 285.0407 and daughter ion at  $m/z$  133.0290 were  
126 identified as luteolin [26], additionally, luteolin has been identified in *L. leucocephala* [27]. Peak 17  
127 with a [M-H]-ion 301.0356 and daughter ions at  $m/z$  107.0130 and 151.0029 were identified as  
128 quercetin [24,28], compound that has also been identified in *L. leucocephala* [29]. Peak 19 with a [M-  
129 H]-ion 269.0457 and daughter ions at  $m/z$  107.0103 and 117.0340 were identified as apigenin [30],  
130 compound identified in the same plant [17]. Peak 20 with a [M-H]-ion 299.0563 and daughter ion at  
131  $m/z$  269.0455 were identified as chrysoeriol [31], which was isolated from *L. leucocephala* [21](Hassan  
132 et al., 2014).

133 *Methoxyphenols*. Two methoxyphenols (peaks 2 and 4) were identified in the ethanolic extract using  
134 UHPLC-Q/Orbitrap/MS/MS. Peak 2 with a [M-H]-ion 377.0857 and daughter ions at  $m/z$  347.0745  
135 and 349.0905 and Peak 4 with a [M-H]-ion 377.0857 and daughter ions at  $m/z$  131.0342, 149.0449 and  
136 341.1090 were identified to as syringaldehyde syringate or derivative of quinic acid. Figure S3 shows  
137 the UHPLC total ion current chromatogram and Table S3 shows all the compounds detected and  
138 identified by UHPLC-Q/Orbitrap/MS/MS and in *Pithecellobium dulce*.

139

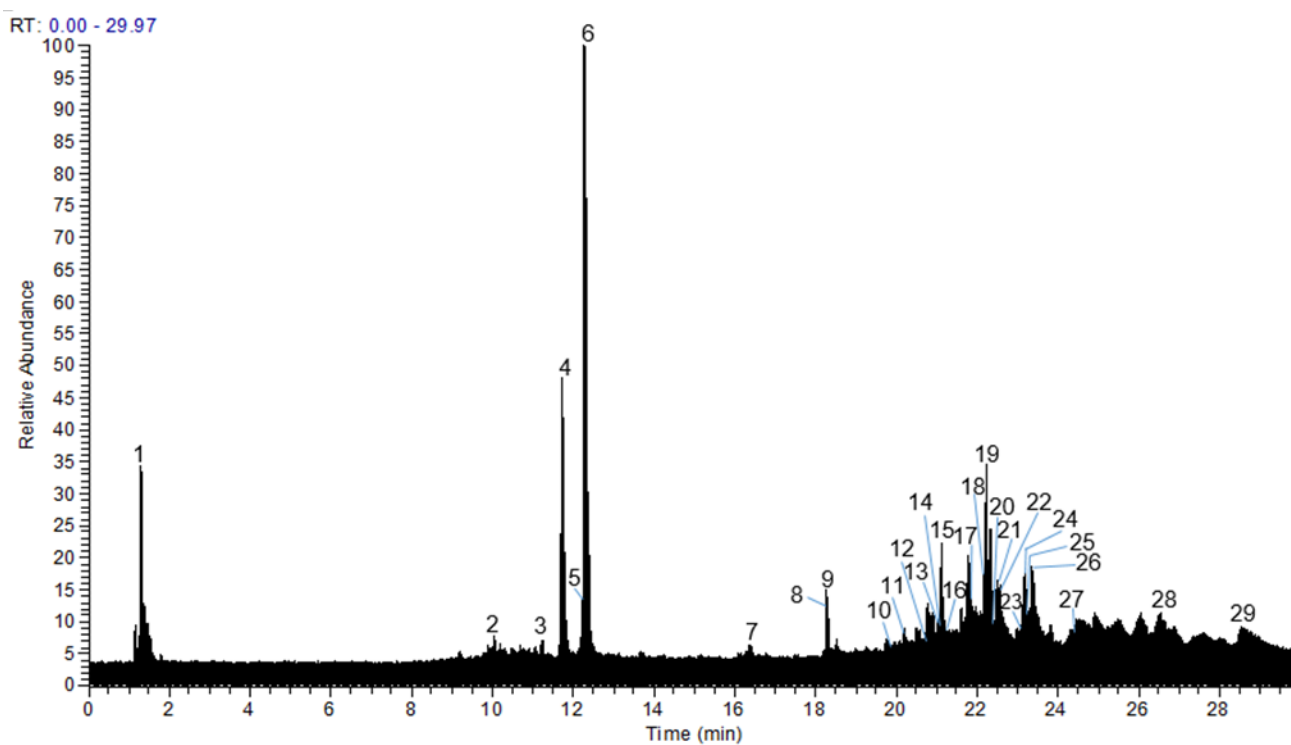

140

141 **Figure S3.** UHPLC TIC Chromatogram of *Pithecellobium dulce* ethanolic extract.

142

143 **Table S3.** Tentative identification of compounds in the ethanolic extract of *Pithecellobium dulce* by UHPLC-Q/Orbitrap/MS/ MS

144

| Peak | Tentative identification              | [M-H] <sup>-</sup><br>ions                                   | Retention time<br>(min.) | Theoretical<br>mass<br>(m/z) | Measured mass<br>(m/z) | Accuracy<br>(ppm) | Other ions<br>(m/z)*                                          | UV vis<br>(nm)        |
|------|---------------------------------------|--------------------------------------------------------------|--------------------------|------------------------------|------------------------|-------------------|---------------------------------------------------------------|-----------------------|
| 1    | Naphthalenedicarboxylic acid-O-hexose | C <sub>18</sub> H <sub>17</sub> O <sub>9</sub> <sup>-</sup>  | 1.31                     | 377.0867                     | 377.0859               | -2.0              | 341.1093, 215.0326, 179.0556,<br>333.0962, 119.0343           | 278                   |
| 2    | Tetrahydroxytetraoxoicosanoic acid    | C <sub>20</sub> H <sub>31</sub> O <sub>10</sub> <sup>-</sup> | 10.03                    | 431.1912                     | 431.1927               | 3.5               | -----                                                         | 280                   |
| 3    | Quercetin-3-glucoside                 | C <sub>21</sub> H <sub>19</sub> O <sub>12</sub> <sup>-</sup> | 11.22                    | 463.0871                     | 463.0887               | 3.3               | 301.0354 (quercetin aglycon),<br>300.0280, 179.0711, 151.0395 | 282                   |
| 4    | Luteolin-7-O-glucoside                | C <sub>21</sub> H <sub>19</sub> O <sub>11</sub> <sup>-</sup> | 11.74                    | 447.0922                     | 447.0937               | 3.2               | 151.003, 107.0132, 255.0294,<br>227.0345                      | 264. 348              |
| 5    | Azelaic acid                          | C <sub>9</sub> H <sub>15</sub> O <sub>4</sub> <sup>-</sup>   | 12.23                    | 187.0965                     | 187.0974               | 4.7               | 121.0654, 123.0808, 141.0914,<br>143.1073, 169.0866, 171.1020 | 282                   |
| 6    | Kaempferol-3-O-rhamnoside             | C <sub>21</sub> H <sub>19</sub> O <sub>10</sub> <sup>-</sup> | 12.29                    | 431.0973                     | 431.0988               | 3.6               | 255.0299, 285.0407<br>(kaempferol), 227.0348                  | 229. 264. 290.<br>343 |
| 7    | Trihydroxyoctadecadienoic acid        | C <sub>18</sub> H <sub>31</sub> O <sub>5</sub> <sup>-</sup>  | 16.36                    | 327.2166                     | 327.2180               | 4.4               | 211.1338, 325.2023                                            | 283                   |
| 8    | Trihydroxyoctadecenoic acid           | C <sub>18</sub> H <sub>33</sub> O <sub>5</sub> <sup>-</sup>  | 18.25                    | 329.2323                     | 329.2337               | 1.4               | 211.1337, 325.1847, 327.2181                                  | 283                   |
| 9    | Unknown                               | C <sub>12</sub> H <sub>19</sub> O <sub>4</sub> <sup>-</sup>  | 18.28                    | 227.1278                     | 227.1288               | 4.4               | -----                                                         | 283                   |
| 10   | Dihydrocapsiate                       | C <sub>18</sub> H <sub>27</sub> O <sub>4</sub> <sup>-</sup>  | 19.75                    | 307.1904                     | 307.1919               | 4.9               | 121.0653, 235.1340, 211.1339,<br>185.1180, 151.0395           | 282                   |
| 11   | Hydroxydioheptadecenoic acid          | C <sub>17</sub> H <sub>27</sub> O <sub>5</sub> <sup>-</sup>  | 20.20                    | 311.1853                     | 311.1865               | 3.8               | 171.1022, 267.1968                                            | 281                   |
| 12   | Phenethyl butyrate                    | C <sub>12</sub> H <sub>15</sub> O <sub>2</sub> <sup>-</sup>  | 20.78                    | 191.1067                     | 191.1077               | 5.2               | -----                                                         | 278                   |

|    |                                     |                         |       |          |          |      |                                           |     |
|----|-------------------------------------|-------------------------|-------|----------|----------|------|-------------------------------------------|-----|
| 13 | Hydroperoxyoctadecatrienoic acid    | $C_{18}H_{29}O_4^-$     | 20.90 | 309.2060 | 309.2075 | 4.6  | -----                                     | 278 |
| 14 | Methoxy heptaetilenglicol           | $C_{15}H_{31}O_8^-$     | 20.98 | 339.2019 | 339.2005 | 4.1  |                                           | 278 |
| 15 | Unknown                             | $C_{30}H_{53}O_{14}N_6$ | 21.12 | 721.3620 | 721.3641 | -2.9 | -----                                     |     |
| 16 | Methoxy heptaetilenglicol isomer    | $C_{15}H_{31}O_8^-$     | 21.23 | 339.2019 | 339.2005 | 4.1  | 309.2075, 325.1848                        | 278 |
| 17 | Unknown                             | $C_{28}H_{43}O_{11}^-$  | 21.82 | 555.2805 | 555.2847 | -7.5 | -----                                     | 275 |
| 18 | Farrerol derivative                 | $C_{29}H_{37}O_6^-$     | 22.13 | 481.2585 | 481.2578 | -1.3 | 151.0396                                  | 275 |
| 19 | Hydroxyoctadecatrienoic acid        | $C_{18}H_{29}O_3^-$     | 22.22 | 293.2111 | 293.2126 | 4.9  | 275.2018, 195.1386                        | 275 |
| 20 | Hydroxyoctadecatrienoic acid isomer | $C_{18}H_{29}O_3^-$     | 22.33 | 293.2111 | 293.2126 | 5.2  | 277.2173, 275.2018, 195.1387              | 275 |
| 21 | Oxo-octadecatrienoic acid           | $C_{18}H_{27}O_3^-$     | 22.47 | 291.1955 | 291.1971 | 5.4  | 277.2176, 275.2023, 195.1387              | 275 |
| 22 | Oxo-octadecatrienoic acid isomer    | $C_{18}H_{27}O_3^-$     | 22.57 | 291.196  | 291.1971 | -3.7 | 277.2176, 275.2023, 195.1387              |     |
| 23 | Heptaetilenglicol                   | $C_{14}H_{29}O_8^-$     | 23.09 | 325.1862 | 325.1848 | 4.3  | 309.1744, 251.1481                        | 275 |
| 24 | Hydroxyoctadecadienoic acid         | $C_{18}H_{31}O_3^-$     | 23.18 | 295.2268 | 295.2283 | 5.2  | 277.2175, 195.1388, 279.1964,<br>253.1805 | 275 |
| 25 | Heptaetilenglicol isomer            | $C_{14}H_{29}O_8^-$     | 23.28 | 325.1862 | 325.1848 | 4.3  | 309.1747, 251.1483                        | 275 |
| 26 | Pentadecatetraenoic acid            | $C_{15}H_{21}O_2^-$     | 23.36 | 233.1536 | 233.1547 | 4.7  | -----                                     | 275 |
| 27 | Heptaetilenglicol isomer            | $C_{14}H_{29}O_8^-$     | 24.80 | 325.1862 | 325.1848 | 4.3  | 309.1743, 251.1485                        |     |
| 28 | Unknown                             | $C_{27}H_{43}O_{14}^-$  | 26.55 | 591.2653 | 591.2614 | 6.5  | -----                                     |     |
| 29 | Unknown                             | $C_{22}H_{25}O_2^-$     | 26.86 | 321.1860 | 321.1825 | 9.3  | -----                                     |     |

145 \* Daughter ions

146

147

148

149



150 *Compounds associated with anthelmintic activity in Pithecellobium dulce*

151 *Glycosylated flavonoids.* Four glycosylated flavonoids corresponding to peaks 3, 4, 6 and 18 were  
152 identified using UHPLC-Q/Orbitrap/MS/MS. Peak 3 with a [M-H]-ion  $m/z$  463.0887 and daughter ions  
153 at  $m/z$  301.0354 (aglycone quercetin) 300.0280, 179.0711 and 151.0395 were identified as quercetin-  
154 3-glucoside [3,32]. Peak 4 with a [M-H]-ion  $m/z$  447.0937 and daughter ions at  $m/z$  151.003, 107.0132,  
155 255.0294 and 227.0345 were identified as luteolin-7-O-glucoside [33]. Peak 6 with a [M-H]-ion  $m/z$   
156 431.0988 and daughter ions at  $m/z$  255.0299, 285.0407 and 227.0348 were identified as kaempferol-3-  
157 O-rhamnoside [34], previously, this compound had been identified in *P. dulce* [35].

158 *Methoxyphenols.* One phenol was identified using UHPLC-Q/Orbitrap/MS/MS. Peak 10 with a  
159 [M-H]-ion  $m/z$  307.1919 and daughter ions at  $m/z$  121.0653, 235.1340, 211.1339, 185.1180 and  
160 151.0395 were identified as dihydrocapsiate [36].

161 *Fatty acids.* One fatty acid was identified using UHPLC-Q/Orbitrap/MS/MS. Peak 5 with a [M-H]-  
162 ion  $m/z$  187.0974 and daughter ions at  $m/z$  121.0654. 123.0808. 141.0914. 143.1073. 169.0866 and  
163 171.1020 was identified as azelaic acid [12].

164

165

166

167

168

169

170

171

172

173

174

175

176

177 **References**

- 178 1. Makita, C., Chimuka, L., Steenkamp, P., Cukrowska, E., & Madala, E. Comparative analyses  
179 of flavonoid content in *Moringa oleifera* and *Moringa ovalifolia* with the aid of UHPLC-qTOF-  
180 MS fingerprinting. *S. Afr. J. Bot.* **2016**, 105, 116–122. [[CrossRef](#)]
- 181 2. Simirgiotis, M.J., Quispe, C., Areche, C., & Sepulveda, B. Phenolic Compounds in Chilean  
182 Mistletoe (Quintral, *Tristerix tetrandus*) Analyzed by UHPLC-Q/Orbitrap/MS/MS and Its  
183 Antioxidant Properties. *Molecules*, **2016** 21(3), 245. [[CrossRef](#)] [[PubMed](#)]
- 184 3. Karar, M. G. E., & Kuhnert, N. UPLC-ESI-Q-TOF-MS/MS characterization of phenolics from  
185 *Crataegus monogyna* and *Crataegus laevigata* (Hawthorn) leaves, fruits and their herbal  
186 derived drops (Crataegutt Tropfen). *J. Chem. Biol. Ther.* **2015**, 1, 1–23 [[CrossRef](#)]
- 187 4. Simirgiotis, M.J., Quispe, C., Mocan, A., Villatoro, J. M., Areche, C., Bórquez, J., Sepúlveda,  
188 B., Echiburru-Chau, C. UHPLC high resolution orbitrap metabolomic fingerprinting of the  
189 unique species *Ophryosporus triangularis* Meyen from the Atacama Desert, Northern Chile.  
190 *Rev. Bras. Farmacogn.* **2017**, 27(2), 179–187. [[CrossRef](#)]
- 191 5. Abu-Reidah, I. M., Arráez-Román, D., Segura-Carretero, A., & Fernández-Gutiérrez, A.  
192 Extensive characterisation of bioactive phenolic constituents from globe artichoke (*Cynara*  
193 *scolymus* L.) by HPLC–DAD-ESI-QTOF-MS. *Food. Chem.* **2013**, 141(3), 2269–2277.  
194 [[CrossRef](#)]
- 195 6. Choi, J., An, X., Lee, B. H., Lee, J. S., Heo, H. J., Kim, T., Ahn, J.W., Kim, D.O. Protective  
196 effects of bioactive phenolics from jujube (*Ziziphus jujuba*) seeds against H<sub>2</sub>O<sub>2</sub>–induced  
197 oxidative stress in neuronal PC-12 cells. *Food. Sci. Biotechnol.* **2015**, 24(6), 2219–2227.  
198 [[CrossRef](#)]
- 199 7. Kumar, S., Chandra, P., Bajpai, V., Singh, A., Srivastava, M., Mishra, D. K., & Kumar, B.  
200 Rapid qualitative and quantitative analysis of bioactive compounds from *Phyllanthus amarus*  
201 using LC/MS/MS techniques. *Ind. Crops. Prod.* **2015**, 69, 143–152. [[CrossRef](#)]
- 202 8. Xu, M., Shao, Q., Ye, S., Li, S., Wu, M., Ding, M., & Li, Y. Simultaneous extraction and  
203 identification of phenolic compounds in *Anoectochilus roxburghii* using microwave-assisted  
204 extraction combined with UPLC-Q-TOF-MS/MS and their antioxidant  
205 activities. *Front. Plant. Sci.* **2017**, 8, 1474. [[CrossRef](#)] [[PubMed](#)]
- 206 9. Ramamoorthy, M., & Paliwal, K. Allelopathic compounds in leaves of *Gliricidia sepium* (Jacq.)  
207 kunth ex walp. and its effect on *Sorghum vulgare* L. *J. Chem. Ecol.* **1993**, 19(8), 1691–1701.  
208 [[CrossRef](#)]

- 209 10. Abu-Reidah, Ali-Shtayeh, M. S., Jamous, R. M., Arráez-Román, D., & Segura-Carretero, A.  
210 Comprehensive metabolite profiling of *Arum palaestinum* (Araceae) leaves by using liquid  
211 chromatography–tandem mass spectrometry. *Food. Res. Int.* **2015**, 70, 74–86. [[CrossRef](#)]
- 212 11. Fu, J., Wang, M., Guo, H., Tian, Y., Zhang, Z., & Song, R. Profiling of components of rhizoma  
213 et radix polygoni cuspidati by high-performance liquid chromatography with ultraviolet diode-  
214 array detector and ion trap/time-of-flight mass spectrometric detection. *Pharmacogn. Mag.*  
215 **2015**, 11(43), 486–501. [[CrossRef](#)]
- 216 12. Ma, X.Q., Leung, A.K.M., Chan, C. L., Su, T., Li, W.D., Li, S. M., Fong, D.W.F., Yu, Z. L.  
217 UHPLC UHD Q-TOF MS/MS analysis of the impact of sulfur fumigation on the chemical  
218 profile of *Codonopsis Radix* (Dangshen). *Analyst.* **2014**, 139(2), 505–516. [[CrossRef](#)]
- 219 13. Hofmann, T., Nebehaj, E., & Albert, L. Antioxidant properties and detailed polyphenol  
220 profiling of European hornbeam (*Carpinus betulus L.*) leaves by multiple antioxidant capacity  
221 assays and high-performance liquid chromatography/multistage electrospray mass  
222 spectrometry. *Ind. Crops. Prod.* **2016**, 87, 340–349. [[CrossRef](#)]
- 223 14. Sójka, M., Guyot, S., Kołodziejczyk, K., Król, B., & Baron, A. Composition and properties of  
224 purified phenolics preparations obtained from an extract of industrial blackcurrant (*Ribes*  
225 *nigrum L.*) pomace. *J. Hortic. Sci. Biotechnol.* **2009**, 84(6), 100–106. [[CrossRef](#)]
- 226 15. Bystrom, L. M., Lewis, B. A., Brown, D. L., Rodriguez, E., & Obendorf, R. L. Characterization  
227 of phenolics by LC-UV/vis, LC-MS/MS and sugars by GC in *Melicoccus bijugatus* Jacq.  
228 “Montgomery” fruits. *Food. Chem.* **2008**, 111(4), 1017–1024. [[CrossRef](#)] [[PubMed](#)]
- 229 16. Lowry, J. B., Cook, N., & Wilson, R. D. Flavonol glycoside distribution in cultivars and hybrids  
230 of *Leucaena leucocephala*. *J. Sci. Food. Agric.* **1984**, 35(4), 401–407. [[CrossRef](#)]
- 231 17. Aderogba, M. A., McGaw, L. J., Bezabih, B. T., & Abegaz, B. M. Antioxidant activity and  
232 cytotoxicity study of *Leucaena leucocephala* (Lam.) de wit leaf extract constituents. *Niger J.*  
233 *Nat. Prod. Med.* **2010**, 13(1), 65–68. [[CrossRef](#)]
- 234 18. Borges, G., Degeneve, A., Mullen, W., & Crozier, A. Identification of flavonoid and phenolic  
235 antioxidants in black currants, blueberries, raspberries, red currants, and cranberries. *J. Agric.*  
236 *Food Chem.* **2010**, 58(7), 3901–3909. [[CrossRef](#)]
- 237 19. Engels, C., Gräter, D., Esquivel, P., Jiménez, V. M., Gänzle, M. G., & Schieber, A.  
238 Characterization of phenolic compounds in jocote (*Spondias purpurea L.*) peels by ultra high-  
239 performance liquid chromatography/electrospray ionization mass spectrometry. *Food. Res. Int.*  
240 **2012**, 46(2), 557–562. [[CrossRef](#)]

- 241 20. Li, A., Hou, X., & Wei, Y. Fast screening of flavonoids from switchgrass and *Mikania*  
242 *micrantha* by liquid chromatography hybrid-ion trap time-of-flight mass spectrometry. *Anal.*  
243 *Methods.* **2018**, 10(1), 109–122. [[CrossRef](#)]
- 244 21. Hassan, R. A., Tawfik, W. A., & Abou-Setta, L. M. The flavonoid constituents of *Leucaena*  
245 *leucocephala*. Growing in Egypt, and their biological activity. *Afr. J. Tradit. Complement.*  
246 *Altern. Med.* **2014**, 11(1), 67–72. [[CrossRef](#)] [[PubMed](#)]
- 247 22. Negi, P., Rawat, B. S., & Negi, D. S. Antifeedant Constituents from *Leucaena leucocephala*.  
248 *J. Appl. Pharm. Sci.* **2016**, 6(12), 28–31. [[CrossRef](#)]
- 249 23. Li, Z. H., Guo, H., Xu, W. B., Ge, J., Li, X., Alimu, M., & He, D. J. Rapid identification of  
250 flavonoid constituents directly from PTP1B inhibitive extract of raspberry (*Rubus idaeus L.*)  
251 leaves by HPLC–ESI–QTOF–MS–MS. *J. Chromatogr. Sci.* **2016**, 54(5), 805–810. [[CrossRef](#)]  
252 [[PubMed](#)]
- 253 24. Brito, A., Ramirez, J. E., Areche, C., Sepulveda, B., & Simirgiotis, M. J. HPLC-UV-MS  
254 profiles of phenolic compounds and antioxidant activity of fruits from three citrus species  
255 consumed in Northern Chile. *Molecules.* **2014**, 19(11), 17400–17421. [[CrossRef](#)]
- 256 25. Mena, P., Cirilini, M., Tassotti, M., Herrlinger, K. A., Dall’Asta, C., & Del Rio, D.  
257 Phytochemical Profiling of Flavonoids, Phenolic Acids, Terpenoids, and Volatile Fraction of a  
258 Rosemary (*Rosmarinus officinalis L.*) Extract. *Molecules.* **2016**, 21(11). [[CrossRef](#)]
- 259 26. McNab, H., Ferreira, E. S. B., Hulme, A. N., & Quye, A. Negative ion ESI–MS analysis of  
260 natural yellow dye flavonoids—An isotopic labelling study. *Int. J. Mass. Spectrom.* **2009**,  
261 284(1), 57–65. [[CrossRef](#)]
- 262 27. Zarina, Z., Ruzaidi, C. M., Sam, S. T., & Mustafa Al Bakri, A. M. Investigation on Antioxidants  
263 Compounds Composition Contains in *Leucaena Leucocephala* (Petai Belalang). *IOP. Conf.*  
264 *Ser. Mater. Sci. Eng.* **2019**, 551, 12016. [[CrossRef](#)]
- 265 28. Saldanha, L. L., Vilegas, W., & Dokkedal, A. L. Characterization of flavonoids and phenolic  
266 acids in *Myrcia bella* Cambess. using FIA-ESI-IT-MS(n) and HPLC-PAD-ESI-IT-MS  
267 combined with NMR. *Molecules.* **2013**, 18(7), 8402–8416. [[CrossRef](#)] [[PubMed](#)]
- 268 29. Abdelhady, N. M., & Abdallah, G. M. HPLC/MS/MS study of phenolic compounds of  
269 *Leucaena leucocephala* legumes monitored with their *in vitro* antihyperglycemic activity.  
270 *European. J. Med. Plants.* **2016**, 17(4), 1–9. [[CrossRef](#)]
- 271 30. Fu, S., Segura-Carretero, A., Arraez-Roman, D., Menendez, J. A., De La Torre, A., &  
272 Fernandez-Gutierrez, A. Tentative characterization of novel phenolic compounds in extra

- 273 virgin olive oils by rapid-resolution liquid chromatography coupled with mass spectrometry. *J.*  
274 *Agric. Food. Chem.* **2009**, 57(23), 11140–11147. [[CrossRef](#)]
- 275 31. Liang, S., Xiong, Z., Tian, J., & Zhang, W.D. Flavones from *Daphne feddei*. *Chem. Nat.*  
276 *Compd.* **2011**, 47(5), 816–817. [[CrossRef](#)]
- 277 32. Bell, L., Oruna-Concha, M. J., & Wagstaff, C. Identification and quantification of glucosinolate  
278 and flavonol compounds in rocket salad (*Eruca sativa*, *Eruca vesicaria* and *Diplotaxis*  
279 *tenuifolia*) by LC-MS: highlighting the potential for improving nutritional value of rocket  
280 crops. *Food. Chem.* **2015**, 172, 852–861. [[CrossRef](#)] [[PubMed](#)]
- 281 33. Ibrahim, R. M., El-Halawany, A. M., Saleh, D. O., El Naggar, E. M. B., El-Shabrawy, A. E. R.  
282 O., & El-Hawary, S. S. HPLC-DAD-MS/MS profiling of phenolics from *Securigera*  
283 *securidaca* flowers and its anti-hyperglycemic and anti-hyperlipidemic activities. *Rev. Bras.*  
284 *Farmacogn.* **2015**, 25(2), 134-141. [[CrossRef](#)]
- 285 34. Neugart, S., Rohn, S., & Schreiner, M. Identification of complex, naturally occurring flavonoid  
286 glycosides in *Vicia faba* and *Pisum sativum* leaves by HPLC-DAD-ESI-MSn and the genotypic  
287 effect on their flavonoid profile. *Food. Res. Int.* **2015**, 76, 114–121. [[CrossRef](#)]
- 288 35. Nigam, S. K., & Mitra, C. R. *Pithecolobium dulce*. V. Chemistry of the seed saponin and  
289 constituents of the leaves. *Planta. Med.* **1970**, 18(1), 44–50. [[CrossRef](#)]
- 290 36. Singh, S., Jarret, R., Russo, V., Majetich, G., Shimkus, J., Bushway, R., & Perkins, B.  
291 Determination of capsinoids by HPLC-DAD in *capsicum* species. *J. Agric. Food. Chem.* **2009**,  
292 57(9), 3452–3457. [[CrossRef](#)]
